# Supplementary material for: Genome-wide association study identifies favorable SNP alleles and candidate genes for frost tolerance in pea
Source: BMC Genomics. 2020 Aug 4;21:536. doi: 10.1186/s12864-020-06928-w (PMC7430820; doi:10.1186/s12864-020-06928-w)
Supplement: Supplementary file 9 — Additional file 9: Table S3. Description of linkage disequilibrium (LD) blocks per linkage group in the association mapping collection. A LD block consists in a series of at least 2 markers which are in significant LD (r2 > 0.8) with at least one trait-associated marker (underlined marker). LD blocks are named in consecutive numerical order following their linkage group (LG) name. cM*: genetic position, in centiMorgan of each marker along the genetic map of the corresponding linkage group; LD (r2) **: r2 value of each marker with the other markers of the same LD block. [file 12864_2020_6928_MOESM9_ESM.xlsx]

## Sheet: Additional file 9_Table S3
LG	LD block	Associated marker	Associated trait	Marker in LD (r2 > 0.8) witht trait-associated marker
I	I.1				PsCam020765_11567_1428	PsCam025082_14309_170
				cM*	47.5	47.5
		PsCam020765_11567_1428	FD_Field_date1	LD (r²)**	1.00	0.92
III	III.1				PsCam049061_31705_537	PsCam035617_20792_637	PsCam037922_22979_691
				cM*	131.1	132	132.1
		PsCam049061_31705_537	FD_CC	LD (r²)**	1.00
		PsCam035617_20792_637	FD_CC, FD_Field_date1		0.91	1.00
		PsCam037922_22979_691	FD_CC, FD_Field_date1		0.91	1.00	1.00
V	V.1				PsCam051352_33858_733	PsCam051635_34107_368	PsCam042222_26315_1205
				cM*	53.6	58.6	61
		PsCam051352_33858_733	WFD_Field_date4	LD (r²)**	1.00
		PsCam051635_34107_368	WFD_Field_date4		0.69	1.00
		PsCam042222_26315_1205	WFD_Field_date4		0.81	0.81	1.00
VI	VI.1				PsCam021402_12023_752	PsCam043553_27552_265
				cM*	41.4	43
		PsCam021402_12023_752	WFD_Field_date4	LD (r²)**	1.00
		PsCam043553_27552_265	WFD_Field_date4		0.81	1.00
	VI.2				PsCam022275_12527_210	PsCam006662_4945_2210	PsCam004890_3696_1580	PsCam023246_13111_1125	PsCam037082_22189_1302	PsCam057485_38078_2761	PsCam037030_22140_221	PsCam009869_6623_546	PsCam037565_22643_550	PsCam034572_19953_2034	PsCam036921_22033_689	PsCam042568_26621_42	PsCam009542_6362_1386
				cM*	47.4	47.4	49.1	49.1	49.1	49.1	49.1	49.1	49.1	50.6	50.9	51.1	55.9
		PsCam022275_12527_210	FD_CC, FD_Field_date1, FD_Field_date4	LD (r²)**	1.00	0.80				0.73	0.82	0.78	0.62	0.82	0.79		0.72
		PsCam004890_3696_1580	FD_Field_date4		0.78	0.82	1.00			0.76	0.84	0.77	0.80	0.85	0.79		0.75
		PsCam023246_13111_1125	FD_Field_date4		0.87	0.87	0.87	1.00		0.82	0.92	0.83	0.70	0.94	0.84		0.83
		PsCam037082_22189_1302	FD_Field_date4		0.80	0.87	0.83	0.88	1.00	0.77	0.85	0.78	0.71	0.86	0.80		0.79
		PsCam042568_26621_42	FD_Field_date4		0.82	0.86	0.85	0.94	0.86	0.79	0.90	0.80	0.68	0.94	0.87	1.00	0.87
	VI.3				PsCam043847_27818_181	PsCam048404_31138_2325	PsCam001662_1375_798	PsCam050022_32630_1411
				cM*	49.1	49.1	49.1	49.1
		PsCam043847_27818_181	FD_CC	LD (r²)**	1.00			0.70
		PsCam048404_31138_2325	FD_CC		0.83	1.00		0.83
		PsCam001662_1375_798	FD_Field_date4		0.72	0.87	1.00	0.75
	VI.4				PsCam007060_5248_2156	PsCam026381_15234_450	PsCam037879_22937_948	PsCam003337_2589_220	PsCam037603_22679_2024	PsCam040539_25267_719
				cM*	50.1	50.1	50.1	50.2	50.2	50.2
		PsCam007060_5248_2156	FD_CC	LD (r²)**	1.00
		PsCam026381_15234_450	FD_CC		0.69	1.00
		PsCam037879_22937_948	FD_CC		0.82	0.84	1.00
		PsCam003337_2589_220	FD_CC		0.98	0.68	0.81	1.00
		PsCam037603_22679_2024	FD_CC		0.95	0.66	0.79	0.96	1.00
		PsCam040539_25267_719	FD_CC		0.95	0.66	0.79	0.96	1.00	1.00
	VI.5				PsCam039054_24037_586	PsCam049925_32537_2703	PsCam043101_27130_869	PsCam036192_21340_510
				cM*	50.6	50.7	50.9	50.9
		PsCam039054_24037_586	FD_CC	LD (r²)**	1.00		0.93	0.89
		PsCam049925_32537_2703	FD_CC		0.96	1.00	0.91	0.88
	VI.6				PsCam006586_4888_245	PsCam020872_11644_1756	PsCam033562_19160_307	PsCam044418_28295_579
				cM*	51.1	51.1	51.1	51.1
		PsCam006586_4888_245	FD_CC	LD (r²)**	1.00
		PsCam020872_11644_1756	FD_CC		0.75	1.00
		PsCam033562_19160_307	FD_CC		0.75	0.80	1.00
		PsCam044418_28295_579	FD_CC		0.87	0.84	0.77	1.00
	VI.7				PsCam036704_21832_970	PsCam053189_35238_569	PsCam035454_20637_2339
				cM*	51.1	51.1	51.1
		PsCam036704_21832_970	FD_CC	LD (r²)**	1.00		0.89
		PsCam053189_35238_569	FD_CC		0.86	1.00	0.84
	VI.8				PsCam011774_8038_200	PsCam023852_13541_264
				cM*	52.8	52.8
		PsCam011774_8038_200	FD_CC	LD (r²)**	1.00
		PsCam023852_13541_264	FD_CC		0.81	1.00
VII	VII.1				PsCam000301_265_1519	PsCam045010_28743_3365
				cM*	87.9	88
		PsCam000301_265_1519	FD_Field_date2, FD_Field_date3	LD (r²)**	1.00
		PsCam045010_28743_3365	FD_Field_date2		0.83	1.00
